# Supplementary material
Source: Elsevier journal article supplement (https://www.sciencedirect.com/science/article/pii/S0213911123000146)
Supplement: mmc1 [file S0213911123000146:mmc1.doc]

**Apéndice**

**Listado completo de propuestas del panel (ordenadas por bloques y desviación cuartil)**

| **n.º** | **Descripción** | **Relevancia** | | | | **Factibilidad** | | | |
| --- | --- | --- | --- | --- | --- | --- | --- | --- | --- |
|  |  | **DQ** | **Me** | **Q1** | **Q3** | **DQ** | **Me** | **Q1** | **Q3** |
| *Gobernanza y financiación del SNS* | | | | | | | | | |
| 9 | Reconfigurar las estructuras de articulación entre los órganos de gobierno del SNS (p. ej., CI-SNS) y órganos técnicos adaptando el alcance, los contendidos, las reglas y las dinámicas de los órganos de gobierno y técnicos | 8,5 | 8 | 8 | 9 | 6,5 | 8 | 5 | 8 |
| 6 | Establecer normativas/código ético de comportamiento en materia de salud para políticos y empleados públicos, incluyendo profesiones sanitarias, registro *lobbies,* puertas giratorias, financiación partidos, etc. | 7,5 | 7,5 | 7 | 8 | 6,5 | 7 | 5 | 8 |
| 17 | Articular «espacios» (comisiones, interministeriales, grupos de trabajo, otros) para alinear políticas de salud en diferentes departamentos ministeriales | 7 | 7 | 6 | 8 | 7 | 7 | 6 | 8 |
| 59 | Forzar que las decisiones de política económica consideren en su formulación los potenciales impactos en salud (informe impacto en salud) | 7 | 7 | 6 | 8 | 5,5 | 7 | 3 | 8 |
| 19 | Establecer un programa normativo (una unidad de la administración en la AESAP) dirigido al *scanning* y al desarrollo de las bases jurídicas y fiscales de un entorno saludable y de ganancias en salud en áreas de interés para la salud de la población | 6,5 | 7 | 4 | 9 | 6,5 | 7 | 5 | 8 |
| 44 | Todas las políticas públicas tendrán prevista la evaluación en su diseño (con los instrumentos necesarios | 6 | 7 | 3 | 9 | 4 | 3 | 2 | 6 |
| 64 | Eliminar el mutualismo administrativo (al menos para los nuevos funcionarios) | 6 | 7 | 2 | 8 | 5 | 5 | 3 | 7 |
| 5 | Refuerzo de los mecanismos de cohesión: fondos de garantía y fondos para objetivos específicos | 6 | 6 | 4 | 8 | 5,5 | 5 | 4 | 7 |
| 39 | Sistema de financiación autonómica más adecuado a la necesidad poblacional | 5,5 | 7 | 3 | 8 | 7 | 7 | 6 | 8 |
| 45 | Generalizar normativamente sistemas de evaluación (guiados por resultados en salud) en servicios sanitarios y sociales | 5,5 | 6 | 3 | 8 | 6 | 7 | 4 | 8 |
| 7 | Decaer los intentos de fosilización de las estructuras ya anquilosadas de gestión de los centros y servicios sanitarios. | 5,5 | 4,5 | 2 | 9 | 3,5 | 4 | 2 | 5 |
| 58 | Aumentar la financiación destinada a servicios de SP, asegurando partidas que aumenten la influencia de la SP en el diseño de políticas. | 5 | 7 | 2 | 8 | 2,5 | 3 | 1 | 4 |
| 57 | Establecer un mecanismo transparente/efectivo de coordinación entre el Estado y otros niveles de la administración en las cuestiones relacionadas con la salud desarrolladas con la Unión Europea | 5 | 7 | 3 | 7 | 4,5 | 6 | 2 | 7 |
| *Reforma de la cartera de servicios y prestaciones del SNS* | | | | | |  |  |  |  |
| 22 | Crear una autoridad independiente de evaluación de prestaciones sanitarias y sociales para su incorporación a la cartera de servicios del SNS | 8 | 9 | 7 | 9 | 5 | 7 | 2 | 8 |
| 31 | Priorización en la incorporación de nuevos fármacos | 6 | 7 | 4 | 8 | 5 | 7 | 3 | 7 |
| 40 | Regulación de cartera negativa y desinversión | 6 | 7 | 5 | 7 | 4,5 | 3 | 2 | 7 |
| 51 | Reformar el copago con tope para activos y las prestaciones que lo mantienen | 5,5 | 6 | 3 | 8 | 4,5 | 4 | 2 | 7 |
| 42 | Iniciar cobertura de salud dental (acotada, especialmente niños y ancianos) y cuidados ópticos (óptica) | 4 | 3 | 2 | 6 | 5 | 7 | 3 | 7 |
| *Recursos humanos del SNS* | | | | | |  |  |  |  |
| 49 | Reformar el marco jurídico de los recursos humanos (estatutos del SNS) para flexibilizar la gestión de profesionales en el SNS | 8 | 9 | 7 | 9 | 5 | 7 | 2 | 8 |
| 14 | Facilitar la incorporación de profesiones acorde con las necesidades de salud de la población y los cambios tecnológicos en el sistema sanitario | 7,5 | 8 | 7 | 8 | 6,5 | 7 | 5 | 8 |
| 41 | Formación médica: orientar la formación hacia la singularización de la atención y la desmedicalización | 6,5 | 6 | 6 | 7 | 5,5 | 6 | 3 | 8 |
| 18 | Favorecer la dedicación exclusiva de los/las profesionales al sistema público | 5 | 7 | 3 | 7 | 6 | 6 | 4 | 8 |
| 24 | Desarrollar un modelo de formación continuada con financiación pública alejado de las industrias | 5 | 6 | 3 | 7 | 4,5 | 4 | 2 | 7 |
| *Salud pública y políticas de salud* | | | | | |  |  |  |  |
| 12 | Modificar sustancialmente el sistema de vigilancia de salud pública para poder informar las estrategias frente a desigualdades | 8 | 8 | 7 | 9 | 6,5 | 7 | 5 | 8 |
| 35 | Intervenciones contra sedentarismo, obesidad y consumo de alcohol | 7,5 | 8 | 7 | 8 | 8,5 | 9 | 8 | 9 |
| 3 | Desarrollar estrategias/acciones en el ámbito de salud mental (formación de adolescentes en el ámbito escolar, romper tabúes desde edades tempranas, ocio saludable en adolescentes, etc.) | 7 | 8 | 5 | 9 | 7,5 | 8 | 7 | 8 |
| 28 | Señalización de gradientes nocivos para la salud (desde tabaco a alimentos ultraprocesados); información en el etiquetado | 7 | 7 | 6 | 8 | 4,5 | 4 | 3 | 6 |
| 16 | Intervenciones contra el tabaquismo: reducir puntos de venta, restricciones de *marketing* y medidas fiscales al consumo, restricciones de utilización, vigilancia de la normativa | 6,5 | 8 | 4 | 9 | 5 | 4 | 3 | 7 |
| 1 | Diseñar la AESAP considerando las propuestas de SESPAS | 6,5 | 8 | 5 | 8 | 5,5 | 8 | 3 | 8 |
| 36 | Favorecer hábitos saludables y complicar nocivos *(nudging);* acciones educativas y fiscales | 6,5 | 6 | 5 | 8 | 4 | 3 | 1 | 7 |
| 56 | Mejorar la comunicación en SP para hacer información y pedagogía en diferentes ámbitos e incluyendo las redes sociales. | 6 | 6 | 4 | 8 | 5,5 | 7 | 3 | 8 |
| 38 | Evaluar el impacto del cambio climático en la salud de la población y desarrollar estrategias/acciones para mitigarlo | 5,5 | 5 | 3 | 8 | 5 | 4 | 2 | 8 |
| 13 | Redefinir responsabilidades individuales y colectivas en las políticas de salud | 5 | 6 | 2 | 8 | 3,5 | 3 | 1 | 6 |
| 62 | Aprendizaje urgente e intensivo en el disruptivo concepto de agencia en red (AESAP) | 5 | 6 | 3 | 7 | 5,5 | 6 | 3 | 8 |
| 29 | Reducción de la disponibilidad de juegos y apuestas, especialmente en zonas de mayor deprivación económica y en plataformas destinadas a la infancia y la adolescencia | 4,5 | 6 | 2 | 7 | 4,5 | 6 | 2 | 7 |
| 50 | Incrementar la coordinación entre políticas de salud humana y animal *(one health):* antibióticos (resistencias bacterianas), zoonosis, higiene alimentaria, etc. | 3,5 | 2 | 2 | 5 | 4,5 | 4 | 2 | 7 |
| 2 | Educación de la población sobre el valor del sistema sanitario público | 3 | 4 | 1 | 5 | 5,5 | 5 | 3 | 8 |
| *Equidad* | | | | | |  |  |  |  |
| 11 | Red de última garantía accesible y suficiente frente a la pobreza | 8 | 8 | 7 | 9 | 5 | 5 | 2 | 8 |
| 21 | Reformar el aplicativo del ingreso mínimo vital para que lo envíen de oficio (borrador IRPF) a las familias que tienen derecho | 7,5 | 8 | 6 | 9 | 6 | 7 | 4 | 8 |
| 34 | Facilitar el acceso a una nutrición saludable y sostenible a precios asequibles | 7 | 7 | 6 | 8 | 6,5 | 8 | 4 | 9 |
| *Sistema sanitario* | | | | | |  |  |  |  |
| 47 | Normativa básica estatal en el ámbito sociosanitario (residencias y otros): reforzar control y estándares | 7,5 | 7 | 7 | 8 | 6,5 | 8 | 5 | 8 |
| 27 | Dotar de mayor capacidad resolutiva a los centros de AP | 7 | 8 | 5 | 9 | 6 | 6 | 4 | 8 |
| 30 | Crear el área de conocimiento de medicina de familia (ANECA); incorporación de la medicina de familia y comunitaria al currículo académico | 7 | 7 | 5 | 9 | 6,5 | 6 | 5 | 8 |
| 20 | Desarrollo de modelos integrados de atención a la fragilidad (mayores, discapacidad, residencias, etc.) | 6,5 | 7 | 5 | 8 | 5 | 7 | 3 | 7 |
| 46 | Avanzar acciones y propuestas concertadas en la atención al final de la vida | 6,5 | 7 | 5 | 8 | 5 | 5 | 3 | 7 |
| 10 | Coordinación y coherencia entre niveles/áreas de atención de las políticas sanitarias (SP, AP, atención hospitalaria, etc.) | 6,5 | 7 | 5 | 8 | 5,5 | 7 | 3 | 8 |
| 23 | Políticas que incentiven todos los ámbitos de la AP y la SP para reforzar sus capacidades y sean de elección preferida por los/las profesionales | 6 | 8 | 3 | 9 | 7 | 8 | 6 | 8 |
| 8 | Desarrollar estrategias/acciones para la sostenibilidad medioambiental del red sanitaria (provisión de energía limpia y renovable, inversión en edificios e infraestructuras de alta eficiencia energética, productos farmacéuticos de bajas emisiones, eficacia del SNS mediante la colaboración horizontal, residuos, centros promotores de salud) | 5,5 | 6 | 3 | 8 | 4,5 | 6 | 2 | 7 |
| 59 | Dejar caer estructuras y activos obsoletos adaptando sus activos valiosos a nuevas configuraciones | 5 | 6,5 | 3 | 7 | 6 | 6 | 4 | 8 |
| 43 | Mejorar la implicación e incrementar la participación/liderazgo de la sociedad civil en las políticas de salud mental | 5 | 4 | 3 | 7 | 5,5 | 7 | 3 | 8 |
| 52 | Incorporar nuevas tecnologías (app, etc.) para la gestión de enfermedades crónicas | 4 | 4 | 2 | 6 | 6,5 | 7 | 5 | 8 |
| 55 | Desarrollar estrategias para la revisión de tratamientos en enfermedades crónicas | 4 | 3 | 1 | 7 | 5 | 3 | 2 | 8 |
| *Investigación sanitaria y otros* | | | | | |  |  |  |  |
| 48 | Implementación efectiva (acceso) del espacio nacional de datos relacionados con la salud | 5,5 | 6 | 3 | 8 | 5,5 | 7 | 3 | 8 |
| 37 | Promoción de la ciencia de salud ciudadana (participación, cocreación, etc.) | 5,5 | 6 | 3 | 8 | 5 | 6 | 3 | 7 |
| 26 | Acceso a datos sanitarios para investigación | 5 | 6 | 3 | 7 | 4,5 | 4 | 3 | 6 |
| 25 | Configurar estrategias de red y estructuras de desarrollo de la investigación clínica y sanitaria, incluyendo la AP | 5 | 4 | 3 | 7 | 4 | 2 | 1 | 7 |
| 54 | Proporcionar energía accesible y no contaminante, incentivando la instalación de placas solares u otras medidas/tecnologías no contaminantes | 4 | 3,5 | 2 | 6 | 5 | 5 | 3 | 7 |
| 32 | Diseñar modelos de salud integrada entre los diferentes niveles del sistema (AP, etc.) | 4 | 3 | 2 | 6 | 6 | 7 | 5 | 7 |
| 4 | Estandarización del acceso a los datos y accesibilidad «inteligente»; generar indicadores para facilitar la interpretación de los datos | 4 | 3 | 2 | 6 | 4,5 | 4 | 3 | 6 |
| 33 | Mapa (definir, concentrar) de centros de referencia en investigación a nivel estatal | 3,5 | 5 | 1 | 6 | 5 | 5,5 | 3 | 7 |

AESAP: Agencia Española de Salud Pública; ANECA: Agencia Nacional de Evaluación de la Calidad y Acreditación; AP: atención primaria; CI-SNS: Consejo Interterritorial del SNS; DQ: desviación cuartil [Q3 − Q1 / 2]; IRPF: Impuesto sobre la Renta de las Personas Físicas; Me: mediana; Q1: cuartil 1 (percentil 25); Q3: cuartil 3 (percentil 75); SESPAS: Sociedad Española de Salud Pública y Administración Sanitaria; SNS: Sistema Nacional de Salud; SP: salud pública.
